# Supplementary material for: Effects of Inulin Propionate Ester Incorporated into Palatable Food Products on Appetite and Resting Energy Expenditure: A Randomised Crossover Study
Source: PubMed Central journal article supplement (PMC6520886; doi:10.3390/nu11040861), 2019-04-16
Supplement: nutrients-11-00861-s001.pdf [file nutrients-11-00861-s001.pdf]

**Table S1.** Nutritional information of unsupplemented food products prior to the addition of 10 g inulin or 10 g IPE <sup>1</sup>.

|                    | Unit | Bread Roll |                  | Fruit smoothie |                   | Total <sup>2</sup> |
|--------------------|------|------------|------------------|----------------|-------------------|--------------------|
|                    |      | per 100 g  | Per 77 g portion | per 100 g      | per 250 g portion | per day            |
| Energy             | KJ   | 1348       | 1032             | 235            | 589               | 1621               |
|                    | kcal | 317        | 243              | 55             | 138               | 381                |
| Fat                | g    | 4.3        | 3.3              | 0.2            | 0.5               | 3.8                |
| of which saturates | g    | 0.8        | 0.6              | 0.1            | 0.1               | 0.7                |
| Carbohydrate       | g    | 66.1       | 50.6             | 13.2           | 33                | 83.6               |
| of which sugars    | g    | 4.6        | 3.5              | 12.3           | 30.8              | 34.3               |
| Fibre              | g    | 3.5        | 2.7              | 1.3            | 3.2               | 5.9                |
| Protein            | g    | 7.6        | 5.8              | 1              | 2.4               | 8.2                |
| Salt               | g    | 1.433      | 1.097            | 0.002          | 0.005             | 1.102              |

<sup>1</sup>as assessed using Dietplan 6; <sup>2</sup>Total when one portion of bread roll and fruit smoothie eaten per day. All food products were identical prior to the addition of 10 g inulin or 10 g IPE; Abbreviations: IPE, inulin-propionate ester.

## Study Design

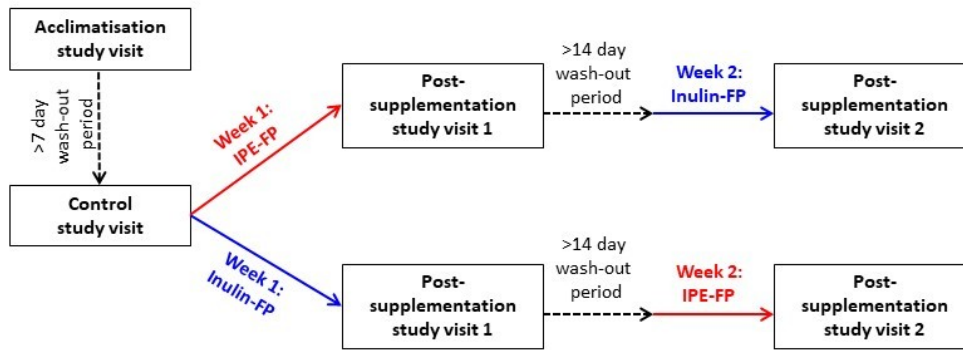

## Study Visit Protocol

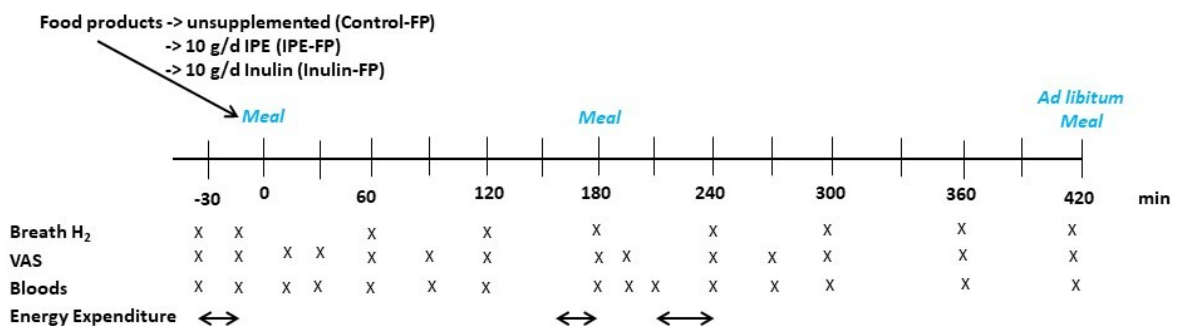

**Figure S1.** Study overview. Breath H<sub>2</sub>, VAS, energy expenditure measurements and blood samples were collected as indicated. Abbreviations: FP, food products; IPE, inulin-propionate ester; VAS, visual analogue scale.

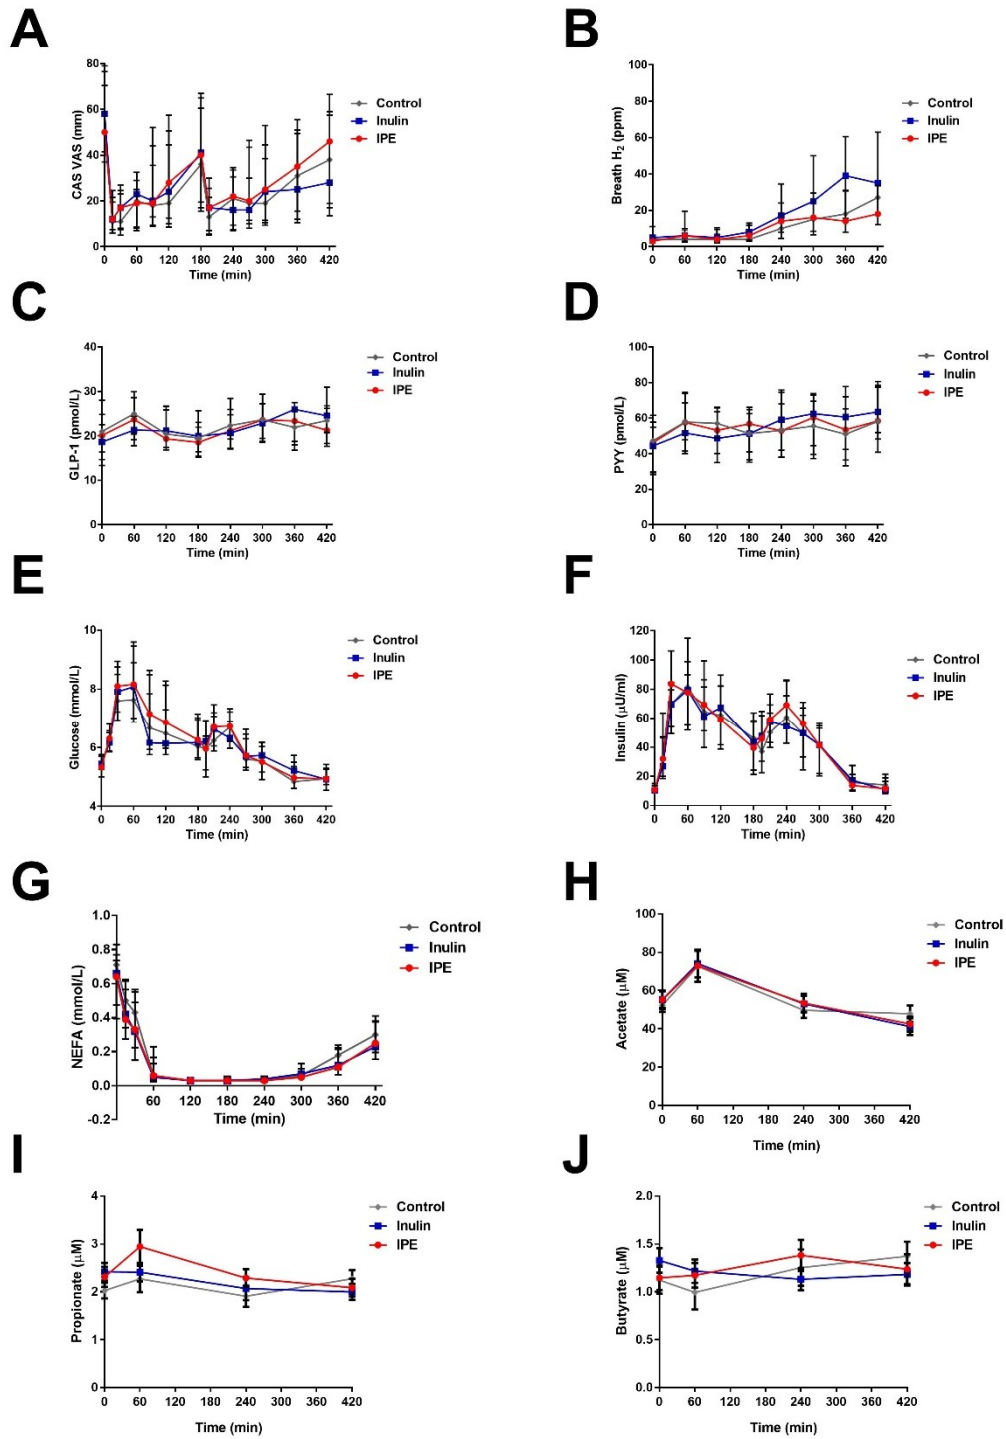

**Figure S2.** Timecourse data for breath H<sub>2</sub>, blood hormones and metabolites following a seven-day supplementation with inulin-FP or IPE-FP compared to control-FP. Data are presented as median [IQR]. Data represent n=21. Abbreviations: CAS, composite appetite score; FP, food products; GLP-1, glucagon-like peptide-1; IPE, inulin-propionate ester; PYY, peptide YY; VAS, visual analogue scale.
